# Supplementary material for: Isolation of a stable lacunary Dawson-type polyoxomolybdate cluster
Source: Royal Society of Chemistry journal article supplement (doi:10.1039/c1cc15439g), 2011-01-01
Supplement: c1cc15439g.pdf [file c1cc15439g.pdf]

## Supplementary Information

### Isolation of a stable lacunary Dawson-type polyoxomolybdate cluster

Akihiro Hashikawa, Makiko Fujimoto, Yoshihito Hayashi\* and Hitoshi Miyasaka

<sup>a</sup>Department of Chemistry, Kanazawa University, Kakuma, Kanazawa 920-1192, Japan.

Fax: +81 76-264-5695; Tel: +81 76-264-5695

E-mail: [hayashi@se.kanazawa-u.ac.jp](mailto:hayashi@se.kanazawa-u.ac.jp)

|                                                                                           |    |
|-------------------------------------------------------------------------------------------|----|
| 1. UV spectrum of <b>1</b> .                                                              | S1 |
| 2. Ortep view of the anionic part of <b>1</b> with numbering scheme.                      | S2 |
| 3. Packing diagram of <b>1</b> .                                                          | S3 |
| 4. Cyclic voltammograms of <b>1</b> and plots of currents vs (scan rate) <sup>1/2</sup> . | S4 |
| 5. Cyclic voltammogram of <b>1</b> after four electron oxidation.                         | S5 |
| 6. IR spectrum of <b>1</b> .                                                              | S6 |

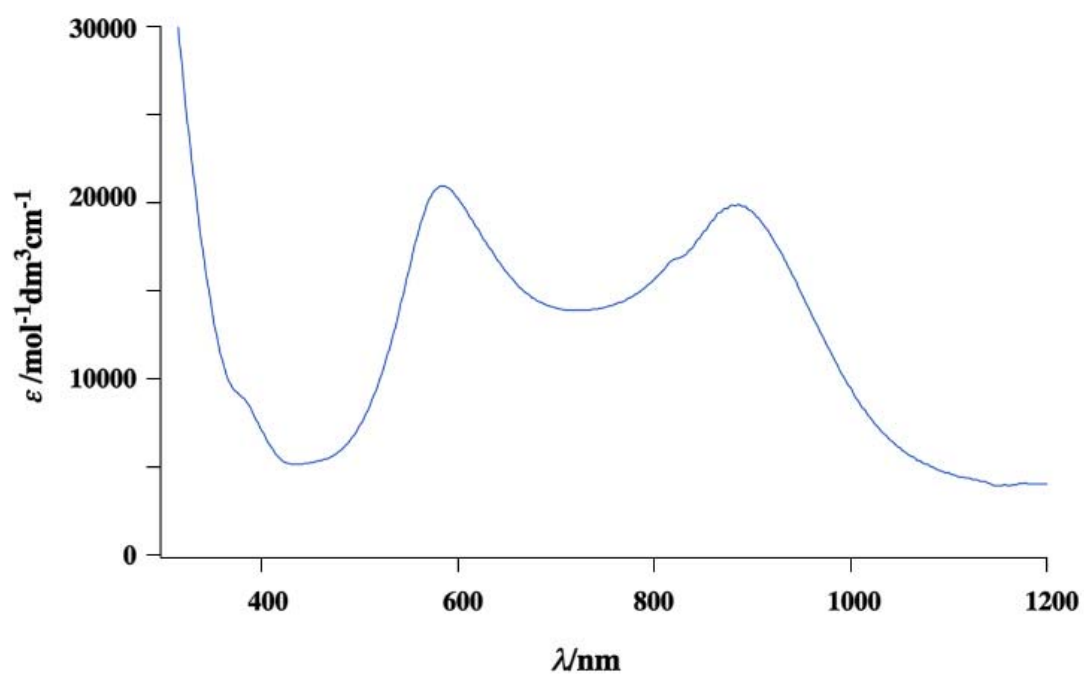

Figure S1. UV absorption spectrum of cluster **1** in acetonitrile solution under nitrogen atmosphere showing broad absorptions in the Vis/NIR region.

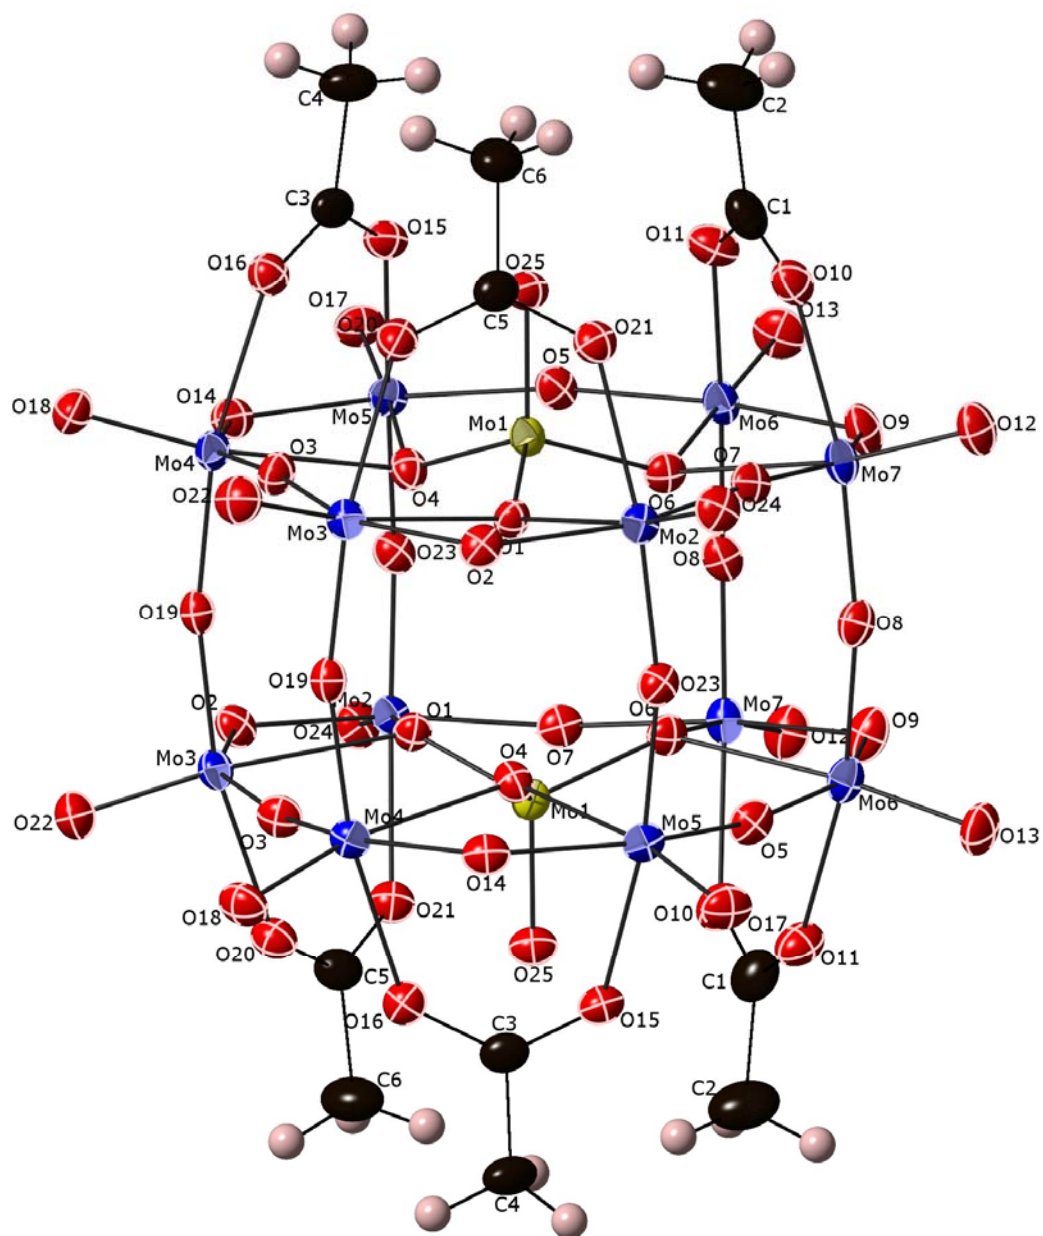

Figure S2. Ortep view of anionic part of **1** with numbering scheme.

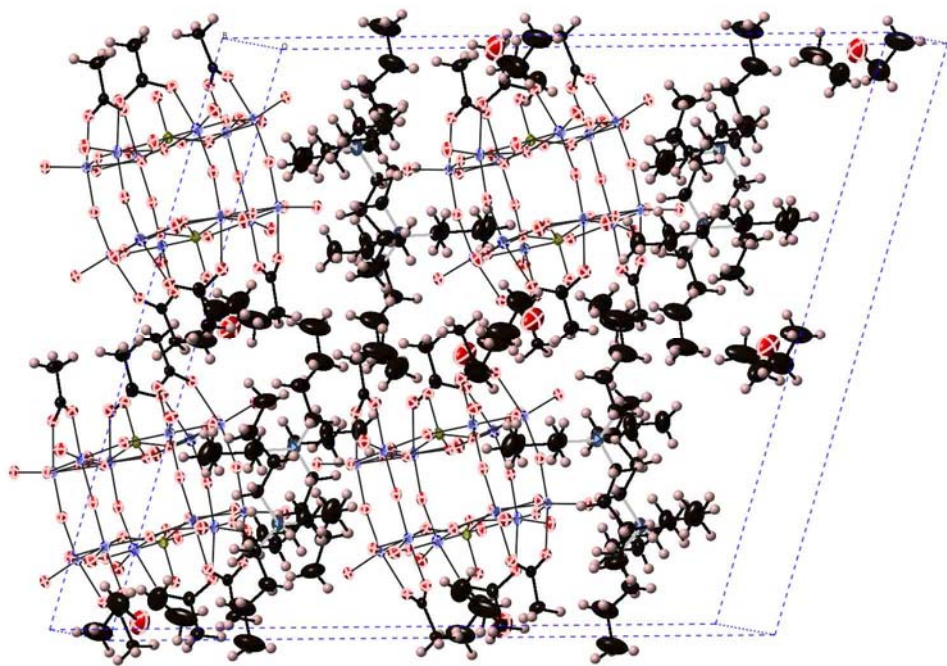

Figure S3. Packing diagram of **1**.

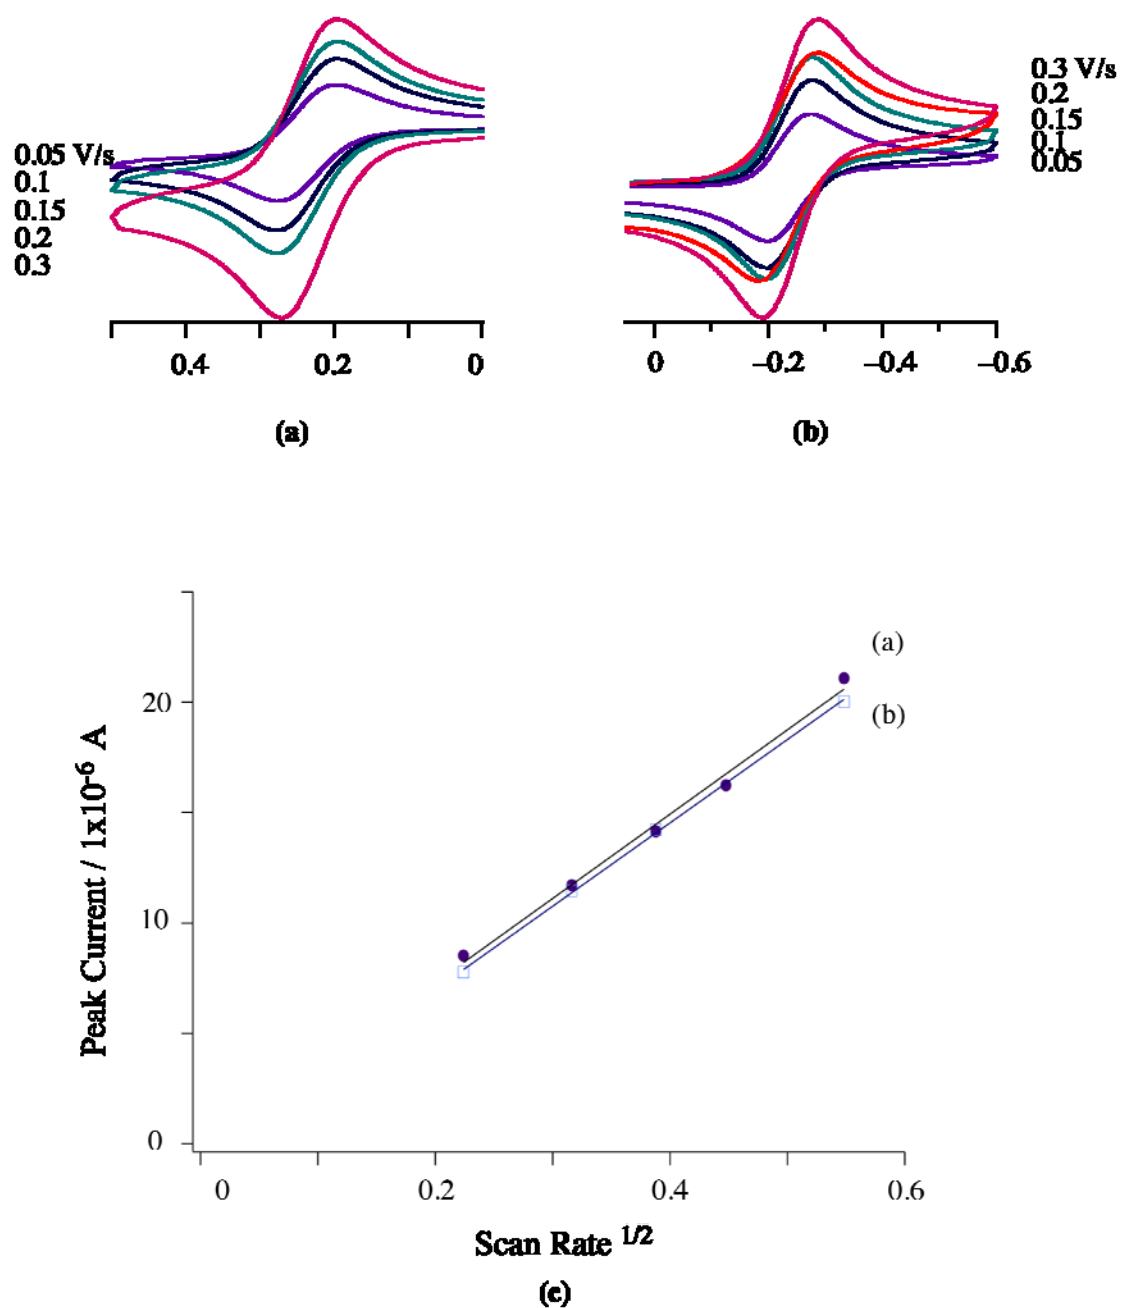

Figure S4. Cyclic voltammograms of **1** at process (a) III and process (b) IV with scan rates of 50, 100, 150, 200 and 300  $\text{mV s}^{-1}$ . (c) plots of peak currents vs square root of the scan rates.

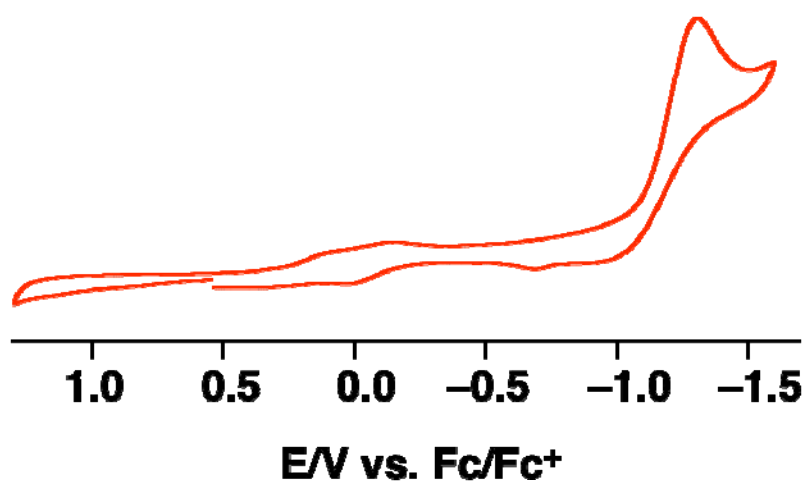

Figure S5. Cyclic voltammogram of **1** after four electron oxidation by controlled potential electrolysis at 1.1 V.

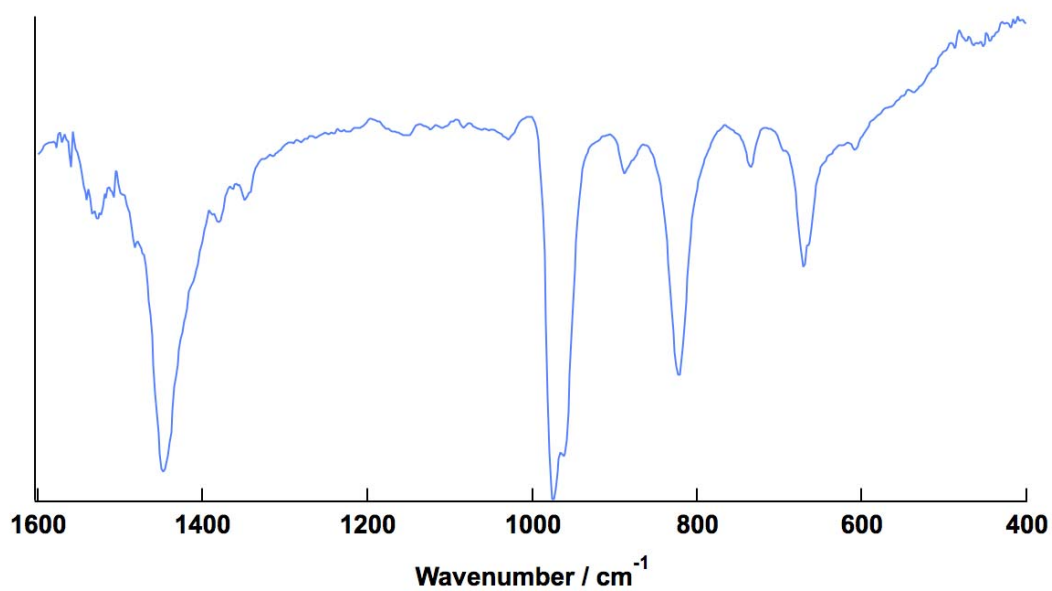

Figure S6. IR spectrum of **1**.
